# Supplementary material
Source: MDPI journal article supplement (https://www.mdpi.com/1996-1073/15/17/6360)
Supplement: s1 [file s1]

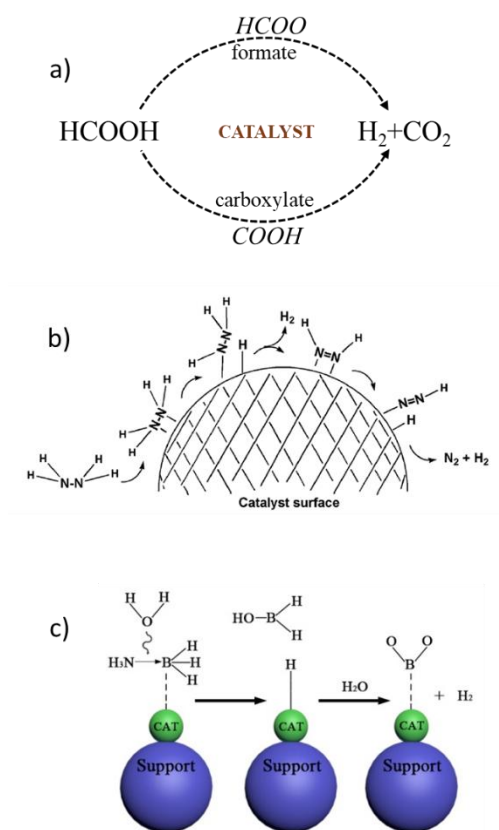

**Figure S1.** Schematic representation of the mechanisms of (a) formic acid, (b) hydrazine hydrate (Reprinted with permission from Ref. Singh, S. K.; Xu, Q., *Nanocatalysts for hydrogen generation from hydrazine. Catalysis Science & Technology* **2013**, 3, 1889-1900. Royal Society of Chemistry) and (c) hydrolytic ammonia borane decomposition (Reprinted with permission from Ref. Liu, M.; Zhou, L.; Luo, X.; Wan, C.; Xu, L., *Recent Advances in Noble Metal Catalysts for Hydrogen Production from Ammonia Borane. Catalysts* **2020**, 10, 788. The Authors).

**Table S1.** Properties of the considered hydrogen storage materials.

|                                       | Formic acid                            | Hydrazine hydrate                                   | Ammonia borane (solid)                                  |
|---------------------------------------|----------------------------------------|-----------------------------------------------------|---------------------------------------------------------|
| Formula                               | HCOOH                                  | N <sub>2</sub> H <sub>4</sub> ·H <sub>2</sub> O     | NH <sub>3</sub> BH <sub>3</sub>                         |
| Hydrogen content, wt %                | 4.4                                    | 8                                                   | 19.6 (7.8, when dissolved in H <sub>2</sub> O)          |
| By-products in decomposition          | CO <sub>2</sub> (CO, H <sub>2</sub> O) | N <sub>2</sub> (NH <sub>3</sub> , H <sub>2</sub> O) | NH <sub>4</sub> BO <sub>2</sub> (if performed in water) |
| Molecular weight, g mol <sup>-1</sup> | 46.03                                  | 50.06                                               | 30.87                                                   |
| Boiling point, K                      | 373.9                                  | 393                                                 | -                                                       |
| Melting point, K                      | 281.5                                  | 221                                                 | 377                                                     |
| Density, g cm <sup>-3</sup>           | 1.22                                   | 1.029                                               | 0.78                                                    |

**Table S2.** The most active catalysts in the formic acid dehydrogenation (TOF>1000 h<sup>-1</sup>).

| Catalyst                                 | MNP mean size, nm | Temperature, K | Additive           | TOF, h <sup>-1</sup> | Reference |
|------------------------------------------|-------------------|----------------|--------------------|----------------------|-----------|
| Monometallic catalysts                   |                   |                |                    |                      |           |
| Au/ZrO <sub>2</sub>                      | 1.8               | 323            | triethylamine      | 1590                 | 1         |
| Au Schiff base modified SiO <sub>2</sub> | 1.2               | 323            | none               | 4368                 | 2         |
| Pd/silicalite                            | 1.5               | 323            | Na formate         | 3027                 | 3         |
| Pd/silicalite                            | 1.7               | 333            | none               | 5803                 | 4         |
| Pd/C (MSC-30)                            | 2.3               | 323            | Na formate         | 2623                 | 5         |
| Pd/C                                     | 1.4               | 323            | Na formate         | 4452                 | 6         |
| Pd/graphene (phenylenediamine modified)  | 1.5               | 323            | Na formate         | 3810                 | 7         |
| Pd/C (MSC-30)                            | 1.4               | 333            | Na formate         | 8414                 | 8         |
| Pd/Fe-N-C                                | 1.4               | 323            | Na formate         | 7361                 | 9         |
| Pd/N-C                                   | 3.2               | 298            | none               | 5530                 | 10        |
| Pd/C doped with K ions                   | 3.6               | 353            | gas-phase reaction | 3600                 | 11        |
| Bimetallic catalysts                     |                   |                |                    |                      |           |
| AuPd/C                                   | 2-3               | 298            | Na formate         | 1120                 | 12        |
| AuPd/N- graphene (amine modified)        | 2.4               | 298            | Na formate         | 4446                 | 13        |
| AuPd/ZrO <sub>2</sub> /C/rGO             | 2.5               | 323            | Na formate         | 4500                 | 14        |
| AuPd/rGO                                 | 3.9               | 323            | Na formate         | 4840                 | 15        |
| AuRh/N-C                                 | 1.6               | 333            | Na formate         | 2297                 | 16        |

**Table S3.** The most active catalysts in the hydrazine hydrate dehydrogenation (TOF>150 h<sup>-1</sup>).

| Catalyst                                                             | MNP mean size, nm | Temperature, K | TOF, h <sup>-1</sup> | Reference |
|----------------------------------------------------------------------|-------------------|----------------|----------------------|-----------|
| Ni-CeO <sub>2</sub> /SiO <sub>2</sub>                                | 2.2               | 343            | 219.5                | 17        |
| PtNi                                                                 | 2.4               | 298            | 150                  | 18        |
| PtNi/N-graphene                                                      | 2.2               | 303            | 943                  | 19        |
| PtNi/ZrO <sub>2</sub> /C/graphene                                    | 1.8               | 323            | 1920                 | 20        |
| PtNi/TiO <sub>2</sub> /Ti <sub>3</sub> C <sub>2</sub> T <sub>x</sub> | 2.8               | 323            | 1220                 | 21        |
| PtNi/N-C                                                             | <10               | 323            | 1602                 | 22        |
| PtNi-CeO <sub>x</sub> /N-graphene                                    | 2-3               | 323            | 3064                 | 23        |
| IrNi/lanthanum oxycarbonate                                          | 2.3               | 323            | 1250                 | 24        |
| PtCo/La(OH) <sub>3</sub>                                             | 3.0               | 323            | 2400                 | 25        |
| RhNiP/graphene                                                       | 2.75              | 323            | 471                  | 26        |
| PtNiP/rGO                                                            | 2.0               | 323            | 742                  | 27        |
| NiFe-Cr <sub>2</sub> O <sub>3</sub>                                  | 10.8              | 343            | 893.5                | 28        |
| NiCu/CeO <sub>2</sub>                                                | 13.1              | 323            | 1450                 | 29        |

**Table S4.** The most active catalysts in the ammonia borane dehydrogenation in the presence of water or methanol (TOF>200 min<sup>-1</sup>).

| Catalyst                    | MNP mean size, nm    | Temperature, K | TOF, min <sup>-1</sup> | Reference |
|-----------------------------|----------------------|----------------|------------------------|-----------|
| hydrolysis                  |                      |                |                        |           |
| Pt/MIL-101                  | 1.8                  | 298            | 414                    | 30        |
| Ru/graphene                 | 1.9                  | 298            | 600                    | 31        |
| Pt/CNTs                     | 1.3                  | 303            | 567                    | 32        |
| Rh/CNTs                     | 2.3                  | 298            | 760                    | 33        |
| PdRh@PVP                    | 2.5                  | 298            | 1333                   | 34        |
| RhRu/ZSM-5                  | 0.7                  | 298            | 1006                   | 35        |
| RuCu/ TiO <sub>2</sub> @C-N | 5.4                  | 298            | 626                    | 36        |
| Ni <sub>2</sub> Pt/ZIF-8    | 2.0                  | 293            | 2222                   | 37        |
| CoNi/MoC                    | atomically dispersed | 298            | 321.1                  | 38        |
| methanolysis                |                      |                |                        |           |
| Rh/CC3R                     | 1.1                  | 298            | 215.3                  | 39        |
